# Supplementary material for: Enhanced photoelectrochemical activity of nanostructured ZnFe2O4thin films prepared by the electrospray technique
Source: Royal Society of Chemistry journal article supplement (doi:10.1039/c6ce02497a), 2017-01-01
Supplement: c6ce02497a1.pdf [file c6ce02497a1.pdf]

Supporting Information

## Enhanced photoelectrochemical activity of nanostructured ZnFe<sub>2</sub>O<sub>4</sub> thin films prepared by electrospray technique

Meng Wang, Yu Sun, Huanwen Chen, Yuan Zhang, Xiaofeng Wu, Keke Huang, Shouhua Feng\*

State Key Laboratory of Inorganic Synthesis and Preparative Chemistry, College of Chemistry, Jilin University, Changchun 130012, P. R. China

Email: [shfeng@mail.jlu.edu.cn](mailto:shfeng@mail.jlu.edu.cn) (Shouhua Feng)

### Results and discussion:

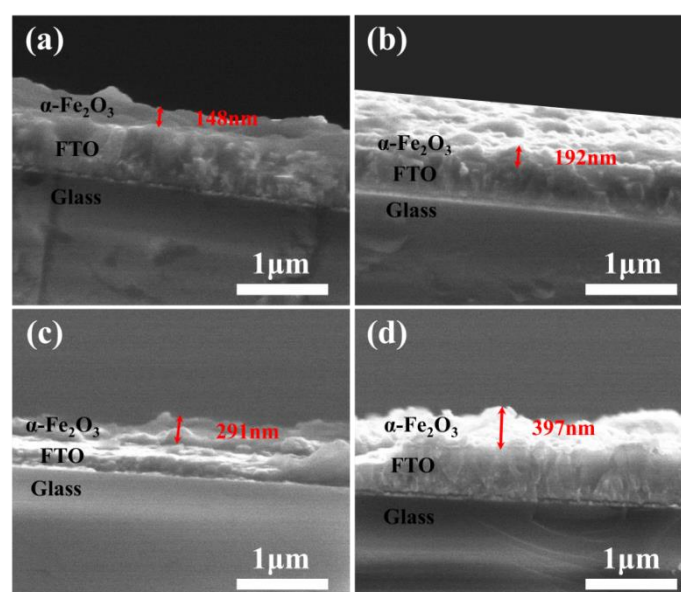

Fig. S1 Cross section SEM images of the films deposited with (a) 100  $\mu$ L (b) 200  $\mu$ L (c) 300  $\mu$ L (d) 400  $\mu$ L of the precursor solution.

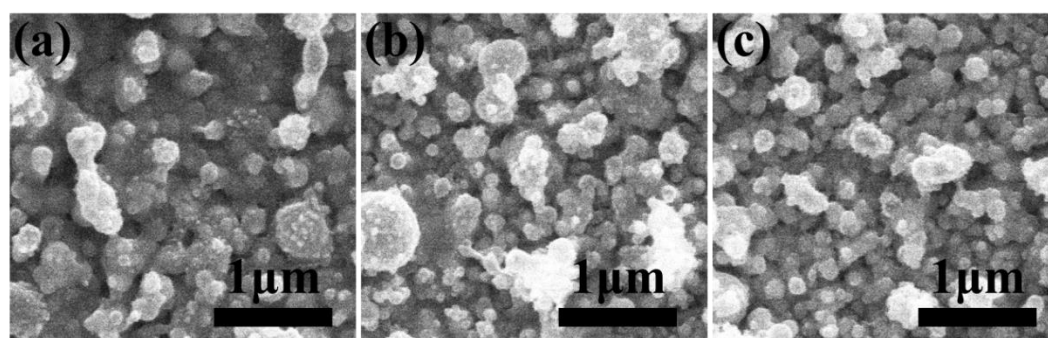

Fig. S2 SEM images of films grown at (a) 5 kV (b) 10 kV (c) 15 kV.
